1 **Inter-ecosystem variation in the food-collection behaviour in**  
2 **climbing perch *Anabas testudineus*, a freshwater fish**

3  
4  
5 **V. V. Binoy\*<sup>1</sup> V. B. Rakesh<sup>2</sup> and Anindya Sinha<sup>1</sup>**

6  
7 *<sup>1</sup>National Institute of Advanced Studies, Indian Institute of Science Campus, Bangalore*  
8 *560012, India*

9 *<sup>2</sup>School of Environmental Sciences, Cochin University of Science and Technology, Main*  
10 *Campus, Trikakkara, Kochi 682022, India*

11  
12  
13 *\*Corresponding author*

14  
15 V. V. Binoy  
16 National Institute of Advanced Studies,  
17 Indian Institute of Science Campus,  
18 Bangalore 560012, India

19 Tel: +91-7829496778

20  
21 Email: [vvbinoy@gmail.com](mailto:vvbinoy@gmail.com)

22  
23 Running title: Cross ecosystem variation in food collection

24  
25  
26  
27  
28  
29  
30  
31

32 **Abstract**

33 A unique piscine behaviour—collection and temporary storage of food materials inside  
34 the mouth during times of availability and particularly in response to starvation—has  
35 been reported in a single species, the climbing perch *Anabas testudineus*. In this study,  
36 we documented a significant variation in the amount of food collected by populations of  
37 climbing perch inhabiting different ecological regimes, *kole* paddy fields, canals and  
38 water channels in coconut plantations, after experiencing starvation for two different  
39 periods of 24 and 48 h. Our results revealed a significant flexibility in this unique  
40 behaviour, depending on the ecological conditions and hunger experienced by the  
41 individuals.

42

43 **Keywords** Feeding behaviour . Foraging . Inter-population variation . Hunger .  
44 Behavioural flexibility . Food stocking

45

46 **Introduction**

47 The collection and storage of food for later consumption is an effective strategy displayed  
48 by different species for the successful exploitation of transitory food resources and to out-  
49 compete potential competitors while foraging in groups [1, 2] . Additionally, the ability to  
50 move food materials out of predation-prone feeding grounds to safer areas for  
51 consumption enhances the personal safety of the individual [3]. This effective foraging  
52 strategy of collection and stocking of food for either short or long durations of time was  
53 traditionally considered the domain of only some species of birds and mammals [2, 4]  
54 until Binoy and Thomas [5] added a freshwater fish, the climbing perch *Anabas*  
55 *testudineus*, to the list. This fish species, the only one known so far to display this unique

56 behaviour, collects food materials in its mouth before ingestion, in a fashion possibly  
57 analogous to the storage of food in the cheek-pouches of cercopithecine primates [4].  
58 Interestingly, as reported in various mammalian species, the climbing perch also  
59 enhances food collection over food consumption after experiencing food deprivation [5].  
60 We would, however, like to point out that although this behaviour, as shown by the  
61 climbing perch, was described as ‘food stocking’ by Binoy and Thomas [5], such a term  
62 better applies to the relatively more prolonged periods of food storage shown by birds  
63 and mammals [2]. The term ‘food collection’ may be more appropriately used to denote  
64 this behaviour, as the climbing perch collects and stores food materials in its mouth for a  
65 few minutes alone [5].

66         The climbing perch (*Anabas testudineus* Bloch) is a shoal-living fish, inhabiting  
67 different kinds of lentic and lotic freshwater ecosystems in India and several southeast  
68 Asian countries [6]. Being equipped with the labyrinthine organ to breathe atmospheric  
69 air, this fish has been reported from waterbodies such as ponds, rivers, marshes, sewage  
70 canals, irrigation canals, *kole* paddy fields and areas of saline intrusion, all of which differ  
71 significantly in their ecological characteristics [7]. In natural habitats, this fish consumes  
72 a wide range of food items including crustaceans, worms, molluscs, insects, algae, soft  
73 parts of aquatic plants and organic debris.

74         It is a well-known fact that the tracing of modulations that characterise the vital  
75 components of the foraging behaviour of a species in relation to the changes happening in  
76 the biotic and abiotic components of its environment is crucial for a comprehensive  
77 understanding of the evolution of its foraging behaviour [8]. The climbing perch thus  
78 offers an excellent model system to study this vital topic in a piscine species due to its  
79 tremendous capacity to adapt to starkly contrasting ecological conditions [7].

80 Furthermore, such information will also be useful in optimising food consumption  
81 behaviour and hence, enhancing the survival and growth of this economically important  
82 fish in artificial environments in which it is cultivated extensively. Unfortunately, till  
83 date, very few studies have explored foraging behaviour of this species in natural or  
84 artificial environments [7, 9, 10], no information is available on the food collection  
85 behaviour of climbing perch populations surviving in contrasting ecological conditions or  
86 on the factors influencing this behaviour.

87 The current paper examines variation in food-collection behaviour of climbing  
88 perch individuals from three different ecosystems—*kole* paddy fields, shallow water  
89 channels in coconut plantations and canals—and deprived of food for two different  
90 durations, 24 and 48 h.

91

## 92 **Materials and Methods**

### 93 **Subject fish and husbandry**

94 Climbing perch were collected from the following three ecosystems, located in different  
95 parts of Thrissur district of Kerala state, southern India.

96 *Water channels:* These shallow channels are characteristic of coconut and banana  
97 plantations of central Kerala [7]. The climbing perch were collected from channels of a  
98 coconut plantation, located at Edathirinji (10.33°N, 76.18°E). This particular water body  
99 (mean water depth  $\pm$  SD of  $60 \pm 20$  cm and breadth,  $50 \pm 15$  cm), situated in between the  
100 rows of coconut plants, was turbid, foul-smelling, due to decaying plant materials, and  
101 occupied by various aquatic and semi-aquatic plants. Although poor-quality water and  
102 reduced availability of space in this shallow ecosystem supported very few piscine  
103 species, the climbing perch survived in this extreme environment due to its capacity to

104 breathe atmospheric air and pliantly available food materials, insect larvae and decaying  
105 plant materials [7].

106 *Canals*: This lotic ecosystem, from which the fish were collected, was located at  
107 Irinjalakuda (10.34°N, 76.19°E) and was contaminated by sewage from houses  
108 present on its banks. The climbing perch population living in this ecosystem had to  
109 face considerable harshness of water flow, transitory food materials as well as the  
110 reduced availability and diversity of food items [7].

111 *Kole paddy fields*: *Kole* is a unique agro-wetland ecosystem, located in the central region  
112 of Kerala state. Being positioned in the basins of two major rivers, this paddy field  
113 resembles a large shallow lake during the monsoons and is utilised for cultivating paddy  
114 for the rest of the year [11]. The *kole* paddy fields are typically extensive in distribution,  
115 hold good-quality water, rich in spatial complexity and exhibit higher levels of primary  
116 and secondary productivity [12], as compared to the irrigation canals and channels.

117 The fish were collected from the Irinjalakuda (10.35°N, 76.21°E) region of the  
118 *kole* and other two focal ecosystems with the help of expert fishermen and transferred to  
119 the laboratory. Only fish of standard length (mean  $\pm$  SD of  $62.4 \pm 26.0$  mm) were used in  
120 the experiments. Due to the lack of sexual dimorphism in this species [13], however, the  
121 subject fish could not be sexed.

122 Individuals from each ecosystem were kept isolated in aquaria ( $45 \times 22 \times 22$  cm)  
123 and these aquaria themselves were used for the subsequent experiments involving the  
124 subject fish. Water temperature was maintained at  $25 \pm 1^\circ\text{C}$  and light hours at 12L: 12D.  
125 Three sides of all aquaria were covered with black paper while steel grids, placed on the  
126 top, prevented the fish from jumping out. Twenty-five food pellets were dropped together  
127 at a specific site in the aquarium once a day (between 09:00 and 10:30) to acclimatise the

128 fish with a specific feeding schedule [5]. No hesitation was shown by the subject fish in  
129 consuming the commercial food pellets from the first day of isolation itself. Unused  
130 pellets were siphoned out 30 min after their addition to the aquarium.

131 After giving five days for acclimating with the laboratory environment, the food-  
132 collection behaviour was tested as follows. In order to standardise their hunger state, the  
133 subject fish were deprived of food materials for 24 h before the experiment. Food pellets  
134 of length (mean  $\pm$  SE) of  $3.58 \pm 0.14$  mm and mass  $0.01 \pm 0.003$  g were dropped, one by  
135 one, at intervals of 1 s at the same site in the aquarium. The subject fish continuously  
136 collected the pellets in their mouth (see also Binoy and Thomas 2008 and Supplementary  
137 Material S1). Pellets falling out of the mouth of the fish due to overfilling or the  
138 individual not gathering food granules for a continuous period of 120 s were marked the  
139 end points of the experiment. The same fish were re-tested to evaluate the impact of  
140 prolongation of the starvation period to 48 h, six days after the first experiment, by  
141 following the same protocol<sup>5</sup>. The availability of climbing perch was much less in the  
142 water channel and canal ecosystems, in comparison to the *kole* paddy fields and hence, 16  
143 individuals were tested from each of the first two ecosystems and 20 fish from the *kole*  
144 paddy field.

145 The parametric tests ANOVA, Tukey's test and paired *t*-test were used for  
146 analysis as the data was established to follow normal distribution (Kolmogorov-Smirnov  
147 Test).

148

## 149 **Results**

150 The study climbing perch populations, collected from different ecological conditions,  
151 differed significantly in their ability to collect food materials inside their mouths after

152 experiencing food deprivation for 24 h (ANOVA,  $F_{2,49} = 4.63$ ,  $p < 0.05$ ; Fig. 1). The  
153 fishes from the canal ecosystem collected significantly greater number of pellets than did  
154 their counterparts from the water channels (Tukey's test,  $t_{ij} = -3.13$ ,  $p < 0.01$ ). However,  
155 no significant difference was observed in the number of pellets collected by the members  
156 of the canal and *kole* paddy field ( $t_{ij} = -1.93$ ,  $p > 0.05$ ) or between the water channel and  
157 *kole* paddy field populations ( $t_{ij} = 0.95$ ,  $p > 0.05$ ).

158 Only individual climbing perches from the *kole* paddy field exhibited significant  
159 modification in the food collection behaviour (ANOVA,  $F_{2,57} = 9.26$ ,  $p < 0.001$ ) when the  
160 duration of food deprivation was increased from 24 to 48 h. These fish collected  
161 significantly more food material in the mouth in response to prolonged starvation than did  
162 their counterparts from the canals ( $t_{ij} = 2.55$ ,  $p < 0.05$ ) or from water channels ( $t_{ij} = 4.79$ ,  
163  $p < 0.001$ ). However, channel and canal populations were not significantly different from  
164 one another in the performance of this unique behaviour when the duration of food  
165 derivation was doubled ( $t_{ij} = -2.12$ ,  $p > 0.05$ ).

166 Differences in the amount of food pellets collected by the individuals from each  
167 of the three focal populations, after experiencing starvation for the two different periods,  
168 was also analysed. The climbing perch from *kole* paddy fields almost doubled the amount  
169 of food collected (paired *t*-test,  $t_{19} = -4.17$ ,  $p < 0.001$ ; Fig. 1) when the food deprivation  
170 was increased from 24 to 48 h but no such behavioural modification was observed in the  
171 individuals from irrigation canals ( $t_{15} = 2.12$ ,  $p > 0.05$ ) or from water channels ( $t_{15} = 1.74$ ,  
172  $p > 0.05$ ).

### 173 **Discussion**

174 The marked differences in the food-collection behaviour of the climbing perch,  
175 collected from three different ecological conditions, could be the result of variation in the

176 food availability, inter- and intra-specific competition and predation pressures  
177 experienced by the individual fishes in their respective habitats [1,5]. The climbing perch  
178 living in the canal, possibly the harshest amongst the three ecosystems studied, have to  
179 survive on the very little food material available in their surroundings. The prevalent  
180 turbidity and water flow could also increase the difficulty of food acquisition manifold  
181 for this visually orienting species [14] in the canals. According to Binoy and Prasanth [7],  
182 the only food present in the gut of the climbing perch, collected from this ecosystem,  
183 were insect larvae (mainly *Chironomus* spp.) and debris, and the studied individuals had  
184 rather low amounts of food in their digestive tracts. Hence, the climbing perch from such  
185 an ecosystem could be collecting the maximum number of food pellets it could, at the  
186 time of availability, which reflected as significant deviation from those taken by the fish  
187 from the water channel and *kole* paddy field populations.

188 In contrast to the canal and water channel ecosystems, the *kole* paddy field  
189 constitutes a geographically widespread habitat covering more than 10 thousand hectares  
190 and famous for the diversity of microhabitats and life forms that it harbours [12].  
191 However, the climbing perch inhabiting this ecosystem typically have to face increased  
192 levels of both predation pressures and competition for food materials from conspecific as  
193 well as heterospecific individuals, in comparison to their counterparts from other two  
194 focal habitats. Generally, air-gulping piscine species synchronise their surfacing activity  
195 in order to reduce the probability of falling prey to aerial predators [15]. Accordingly, the  
196 number of climbing perch observed performing orchestrated air-gulping activity in each  
197 bout was considerably high in the *kole* paddy fields (pers. obs.).

198 Moreover, an exploration of the catch of fishermen revealed that the number of  
199 individuals of the major piscine predators of the subject species, the snakeheads (*Channa*



200 *striatus* and *C. marulius*), were much less prevalent in the water channel and canal  
201 ecosystems (pers. obs.). Enhancing levels of food collection, therefore, could be a  
202 behavioural adaptation exhibited by hungry climbing perches living in the *kole* paddy  
203 field ecosystem, to out-compete their conspecifics or heterospecifics by acquiring more  
204 food during times of availability. The climbing perch investigated in a previous study [5]  
205 were captured from a large pond, which resembled a *kole* paddy field in its ecological  
206 properties, and showed a similar enhancement in their food collection strategy.  
207 Furthermore, a recent study by Zworykin [10] has proven that the presence of conspecific  
208 individuals could influence the feeding behaviour of climbing perch; this study reported a  
209 significant variation in the foraging behaviour of individuals when tested in isolation and  
210 in presence of the conspecifics. It may also be noted here that a similar analogous  
211 enhancement of food stocking in the cheek pouch to out-compete competitive  
212 conspecifics during intensive feeding bouts has also been reported in troops of different  
213 cercopithecine primate species [1, 5].

214 In conclusion, therefore, individuals of species such as the climbing perch could  
215 vary their ability to utilise food resources due to their adaptation to the food web in which  
216 they are embedded [16, 17]. Additionally, however, the species that we studied is famous  
217 not only for its specific ability to survive under a wide range of ecological conditions but  
218 also for migration over land and consequently changing habitats during the monsoons  
219 [18]. An earlier study by our group [7] revealed that climbing perch populations living in  
220 contrasting ecological conditions display great disparity in the nature and quantity of food  
221 items consumed. A detailed analysis of the adaptive modifications of foraging behaviour  
222 by this species in dissimilar ecosystems could thus reveal the interplay between  
223 physiological, social and environmental factors in determining the unique food-collection

224 behaviour displayed by this species.

225 **Acknowledgements** VVB is grateful to the Science and Engineering Research Board  
226 (SERB), Department of Science and Technology, Government of India, for a Young  
227 Scientist (Fast Track) Grant (SB/FT/LS-155/2012) that enabled this study. The  
228 experiments reported in this paper comply with the current relevant laws of India.

229

## 230 **References**

231

- 232 1. Smith LW, Link A, Cords M (2008) Cheek pouch use, predation risk, and feeding  
233 competition in blue monkeys (*Cercopithecus mitis stuhlmanni*). *Am J Phys*  
234 *Anthropol* 137: 334–341
- 235 2. Pravosudov VV, Roth II TC (2013) Cognitive ecology of food hoarding: the  
236 evolution of spatial memory and the hippocampus. *Ann Rev Ecol Evol Syst*  
237 44: 173–193
- 238 3. Valone TJ, Lima SL (1987) Carrying food items to cover for consumption: The  
239 behavior of ten bird species feeding under the risk of predation. *Oecologia* 71:  
240 286–294
- 241 4. Lambert JE (2005) Competition, predation and evolutionary significance of  
242 cercopithecine cheek pouch: The case of *Ceropithecus* and *Lophocebus*. *Am J*  
243 *Phys Anthropol* 126: 183–192
- 244 5. Binoy VV, Thomas KJ (2008) Influence of hunger on the food stocking behaviour  
245 of climbing perch. *J Fish Biol.* 73: 1053–1057
- 246 6. Talwar PK, Jhingran AG (1991) Inland fishes of India and adjacent countries.  
247 Oxford and I B H Publishing Company, New Delhi

- 248 7. Binoy VV, Prasanth PS (2016) Diet variation in climbing perch populations  
249 inhabiting eight different types of ecosystems. *ArXiv Preprint, arXiv:1610.03668*.
- 250 8. Quispe R, Villavicencio CP, Cortés A, Vásquez RA (2009) Inter-population  
251 variation in hoarding behaviour in degus, *Octodon degus*. *Ethology* 115:  
252 465–474
- 253 9. Binoy VV (2015) Food patch choice in climbing perch *Anabas testudineus*  
254 (Bloch, 1792). *I J Fish* 62: 149–151
- 255 10. Zworykin DD (2018) The behaviour of climbing perch, *Anabas testudineus*, with  
256 novel food in individual and social conditions. *J Ichthyol* 58: 260–264
- 257 11. Johnkutty I, Venugopal VK (1993) Kole-Lands of Kerala. Kerala Agricultural  
258 University, Trissur, India
- 259 12. Thomas JK, Sreekumar S, Cheriyan J (2003) Muriyad wetlands: Ecological  
260 changes and human consequences. Project report submitted to Kerala Research  
261 Programme on Local Development, Centre for Developmental Studies,  
262 Thiruvananthapuram, India
- 263 13. Zworykin DD (2012) Reproduction and spawning behaviour of the climbing  
264 perch *Anabas testudineus* (Perciformes, Anabantidae) in an aquarium. *J Ichthyol*  
265 52: 379–388

- 266 14. Binoy VV, Kasturirangan R, Sinha A (2015) Sensory cues employed for the  
267 acquisition of familiarity-dependent recognition of a shoal of conspecifics by  
268 climbing perch (*Anabas testudineus* Bloch). *J Biosci* 40: 225–232
- 269 15. Killen SS, Esbaugh AJ, F Martins N, Tadeu Rantin F, McKenzie D J (2018)  
270 Aggression supersedes individual oxygen demand to drive group air-breathing in  
271 a social catfish. *J Anim Ecol* 87: 223–234
- 272 16. Bolnick DI, Amarasekare P, Araújo MS, Bürger R, Levine JM, Novak M, Rudolf  
273 VH, Schreiber SJ, Urban MC, Vasseur DA (2011) Why intraspecific trait  
274 variation matters in community ecology. *Trends Ecol Evol* 26: 183–192
- 275 17. Nifong JC, Layman CA, Silliman BR (2015) Size, sex and individual-level  
276 behaviour drive intra-population variation in cross-ecosystem foraging of a top-  
277 predator. *J Anim Ecol* 84: 35–48
- 278 18. Sokheng C, Chhea CK, Viravong S, Bouakhamvongsa K, Suntomratana U,  
279 Yoorong, N, Tung NT, Bao TQ, Poulsen AF, Jorgensen JV (1999) Fish  
280 migrations and spawning habits in the Mekong mainstream: a survey using local  
281 knowledge (basin-wide). *Assessment of Mekong Fisheries: Fish Migrations and*  
282 *Spawning and the Impact of Water Management Project (AMFC). AMFP Report*  
283 *2, Vientiane, Lao PDR*
- 284  
285  
286  
287  
288  
289

290 **Legend to Figure 1**

291

292 Mean number of food pellets collected in the mouth by climbing perch living in different

293 ecosystems, after experiencing food deprivation for 24 and 48 h.

294

295

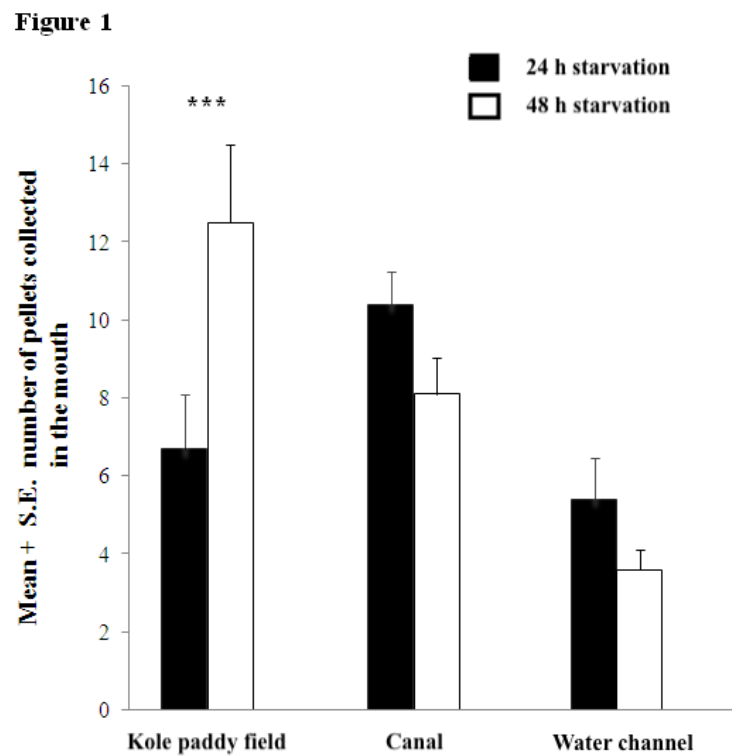

296

297

298

299

300

301

302

303

304

305

306 **Legend to the Electronic Supplementary Material S1**

307

308 The study species, climbing perch, collecting food pellets for storage in its mouth.

309
